# Supplementary material
Source: Research Square preprint supplement (doi:10.21203/rs.3.rs-8774043/v1)

# **Supplementary data**

Table S1: Simple linear regression of total number of participants

|  | **Total** | | | | | |
| --- | --- | --- | --- | --- | --- | --- |
| **Practice score** | | **Knowledge score** | | **Attitude score** | |
| **Variable** | **Standardized Beta** | **p-value** | **Standardized Beta** | **p-value** | **Standardized Beta** | **p-value** |
| Age | -0.136 | 0.263 | 0.201 | **<0.001** | 0.090 | **0.042** |
| Gender   - *Female - male | 0.075 | 0.538 | 0.003 | 0.946 | 0.002 | 0.963 |
| Living area   - *Urban - Rural | -0.016 | 0.894 | -0.003 | 0.942 | 0.041 | 0.755 |
| number of family members | 0.007 | 0.953 | 0.041 | 0.760 | -0.036 | 0.417 |
| Educational level   - *Non university - University | 0.163 | **0.177** | 0.069 | **0.122** | 0.042 | 0.340 |
| Are you studying or have you studied something related to health?   - *Yes - No | 0.120 | 0.324 | 0.013 | 0.765 | 0.095 | **0.033** |
| Chronic disease presence   - *Yes - No | 0.169 | **0.161** | -0.019 | 0.662 | 0.007 | 0.874 |
| Income level   - *Others - More than 1000$/month | -0.061 | 0.616 | 0.097 | **0.029** | 0.065 | **0.140** |
| What type of olive oil do you use?   - *Others - Extra virgin olive oil&Virgin olive oil | 0.216 | **0.072** | 0.332 | **<0.001** | 0.087 | **0.050** |
| Do you or your family/relatives produce olive oil?   - *Yes - No | -0.009 | 0.940 | -0.207 | **<0.001** | -0.137 | **0.002** |
| Have you heard of olive pomace oil?   - *Yes - No | 0.033 | 0.785 | -0.302 | **<0.001** | -0.195 | **<0.001** |

Table S2: Simple linear regression of each country separately

|  | **Jordan** | | | | | | | | | | | |
| --- | --- | --- | --- | --- | --- | --- | --- | --- | --- | --- | --- | --- |
| **Practice score** | | | | **Knowledge score** | | | | **Attitude score** | | | |
| **Variable** | **Standardized Beta** | | **p-value** | | **Standardized Beta** | | **p-value** | | **Standardized Beta** | | **p-value** | |
| Age | -0.006 | | 0.910 | | 0.343 | | **<0.001** | | 0.113 | | **0.018** | |
| Gender   - *Female - male | -0.087 | | **0.122** | | -0.031 | | 0.589 | | -0.017 | | 0.760 | |
| Living area   - *Urban - Rural | 0.086 | | **0.129** | | 0.071 | | **0.206** | | -0.024 | | 0.672 | |
| number of family members | 0.083 | | **0.139** | | -0.036 | | 0.521 | | -0.060 | | 0.289 | |
| Educational level   - *Non university - University | -0.019 | | 0.731 | | 0.071 | | 0.765 | | 0.020 | | 0.725 | |
| Are you studying or have you studied something related to health?   - *Yes - No | -0.082 | | **0.146** | | 0.093 | | **0.098** | | 0.157 | | **0.005** | |
| Chronic disease presence   - *Yes - No | 0.013 | | 0.814 | | -0.074 | | **0.193** | | -0.046 | | 0.412 | |
| Income level   - *Others - More than 1000$/month | -0.023 | | 0.679 | | -0.073 | | **0.197** | | 0.087 | | **0.123** | |
| What type of olive oil do you use?   - *Others - Extra virgin olive oil&Virgin olive oil | 0.054 | | 0.342 | | 0.317 | | **<0.001** | | 0.072 | | **0.204** | |
| Do you or your family/relatives produce olive oil?   - *Yes - No | -0.023 | | 0.690 | | -0.203 | | **<0.001** | | -0.148 | | **0.008** | |
| Have you heard of olive pomace oil?   - *Yes - No | -0.137 | | **0.015** | | -0.323 | | **<0.001** | | -0.278 | | **<0.001** | |
|  | | **Morocco** | | | | | | | | | | |
| **Practice score** | | | | **Knowledge score** | | | | **Attitude score** | | |
| **Variable** | | **Standardized Beta** | | **p-value** | | **Standardized Beta** | | **p-value** | | **Standardized Beta** | | p-value |
| Age | | -0.131 | | **0.143** | | 0.077 | | 0.393 | | 0.080 | | **0.374** |
| Gender   - *Female - male | | -0.190 | | **0.033** | | 0.224 | | **0.012** | | 0.163 | | **0.069** |
| Living area   - *Urban - Rural | | 0.010 | | 0.908 | | -0.040 | | 0.659 | | 0.118 | | **0.188** |
| number of family members | | 0.105 | | **0.242** | | 0.020 | | 0.826 | | -0.041 | | 0.652 |
| Educational level   - *Non university - University | | 0.033 | | 0.711 | | 0.246 | | **0.005** | | 0.096 | | 0.285 |
| Are you studying or have you studied something related to health?   - *Yes - No | | -0.023 | | 0.799 | | -0.128 | | **0.152** | | -0.042 | | 0.638 |
| Chronic disease presence   - *Yes - No | | -0.112 | | **0.213** | | -0.016 | | 0.862 | | 0.143 | | **0.111** |
| Income level   - *Others - More than 1000$/month | | 0.012 | | 0.894 | | 0.090 | | 0.314 | | -0.006 | | 0.950 |
| What type of olive oil do you use?   - *Others - Extra virgin olive oil & Virgin olive oil | | 0.227 | | **0.010** | | 0.283 | | **0.001** | | 0.041 | | 0.650 |
| Do you or your family/relatives produce olive oil?   - *Yes - No | | 0.093 | | 0.298 | | -0.048 | | 0.594 | | -0.070 | | 0.437 |
| Have you heard of olive pomace oil?   - *Yes - No | | -0.026 | | 0.777 | | -0.009 | | 0.923 | | 0.084 | | 0.351 |
|  | | **Egypt** | | | | | | | | | | |
| **Practice score** | | | | **Knowledge score** | | | | **Attitude score** | | |
| **Variable** | | **Standardized Beta** | | **p-value** | | **Standardized Beta** | | **p-value** | | **Standardized Beta** | | **p-value** |
| Age | | -0.136 | | 0.263 | | -0.071 | | 0.562 | | -0.086 | | 0.477 |
| Gender   - *Female - male | | 0.075 | | 0.538 | | -0.088 | | 0.469 | | -0.137 | | 0.258 |
| Living area   - *Urban - Rural | | -0.016 | | 0.894 | | -0.185 | | **0.126** | | 0.060 | | 0.620 |
| number of family members | | 0.007 | | 0.953 | | -0.044 | | 0.719 | | 0.026 | | 0.832 |
| Educational level   - *Non university - University | | 0.163 | | **0.177** | | 0.019 | | 0.876 | | 0.094 | | 0.437 |
| Are you studying or have you studied something related to health?   - *Yes - No | | 0.120 | | 0.324 | | 0.092 | | 0.450 | | 0.081 | | 0.507 |
| Chronic disease presence   - *Yes - No | | 0.169 | | **0.161** | | 0.020 | | 0.870 | | -0.073 | | 0.549 |
| Income level   - *Others - More than 1000$/month | | -0.061 | | 0.616 | | 0.028 | | 0.816 | | -0.029 | | 0.814 |
| What type of olive oil do you use?   - *Others - Extra virgin olive oil&Virgin olive oil | | 0.216 | | **0.072** | | 0.314 | | **0.008** | | 0.153 | | **0.206** |
| Do you or your family/relatives produce olive oil?   - *Yes - No | | -0.009 | | 0.940 | | 0.106 | | 0.381 | | 0.022 | | 0.855 |
| Have you heard of olive pomace oil?   - *Yes - No | | 0.033 | | 0.785 | | -0.117 | | 0.333 | | -0.073 | | 0.546 |

Table S3: Multiple linear regression of each country separately

|  | | **Jordan** | | | | | | | | | | |
| --- | --- | --- | --- | --- | --- | --- | --- | --- | --- | --- | --- | --- |
|  | | **Practice score** | | | | **Knowledge score** | | | | **Attitude score** | | |
| **Variable** | | **Standardized Beta** | | **p-value** | | **Standardized Beta** | | **p-value** | | **Standardized Beta** | | **p-value** |
| Age | |  | |  | | 0.304 | | **<0.001** | | 0.016 | | 0.797 |
| Gender   - *Female - male | | -0.109 | | 0.058 | |  | |  | |  | |  |
| Living area   - *Urban - Rural | | 0.102 | | 0.076 | | 0.019 | | 0.705 | |  | |  |
| number of family members | | 0.061 | | 0.285 | |  | |  | |  | |  |
| Are you studying or have you studied something related to health?   - *Yes - No | | -0.088 | | 0.125 | | -0.109 | | 0.055 | | 0.126 | | **0.041** |
| Chronic disease presence   - *Yes - No | |  | |  | | 0.049 | | 0.349 | |  | |  |
| Income level   - *Others - More than 1000$/month | |  | |  | | 0.015 | | 0.775 | | 0.111 | | **0.044** |
| What type of olive oil do you use?   - *Others - Extra virgin olive oil/ Virgin olive oil | |  | |  | | 0.191 | | **<0.001** | | -0.040 | | 0.483 |
| Do you or your family/relatives produce olive oil?   - *Yes - No | |  | |  | | -0.146 | | **0.004** | | -0.112 | | **0.041** |
| Have you heard of olive pomace oil?   - *Yes - No | | -0.152 | | **0.007** | | -0.224 | | **<0.001** | | -0.254 | | **<0.001** |
|  | | **Morocco** | | | | | | | | | | |
| **Practice score** | | | | **Knowledge score** | | | | **Attitude score** | | |
| **Variable** | | **Standardized Beta** | | **p-value** | | **Standardized Beta** | | **p-value** | | **Standardized Beta** | | **p-value** |
| Age | | -0.113 | | 0.230 | |  | |  | |  | |  |
| Gender   - *Female - male | | -0.185 | | **0.047** | | 0.177 | | **0.039** | | 0.162 | | 0.069 |
| Living area   - *Urban - Rural | |  | |  | |  | |  | | 0.096 | | 0.281 |
| number of family members | | 0.096 | | 0.276 | |  | |  | |  | |  |
| Educational level   - *Non university   University | |  | |  | | 0.152 | | 0.090 | |  | |  |
| If you are a university graduate, is your degree related to a health specialty, health sciences, or nutrition?   - *Yes - No | |  | |  | | -0.078 | | 0.370 | |  | |  |
| Chronic disease presence   - *Yes - No | | -0.181 | | **0.040** | |  | |  | | 0.145 | | 0.102 |
| What type of olive oil do you use?   - *Others - Extra virgin olive oil/ Virgin olive oil | | 0.251 | | **0.005** | | 0.233 | | **0.007** | |  | |  |
|  | **Egypt** | | | | | | | | | | | |
| **Practice score** | | | | **Knowledge score** | | | | **Attitude score** | | | |
| **Variable** | **Standardized Beta** | | **p-value** | | **Standardized Beta** | | **p-value** | | **Standardized Beta** | | **p-value** | |
| Living area   - *Urban - Rural |  | |  | | -0.143 | | 0.222 | |  | |  | |
| Educational level   - *Non university - University | 0.159 | | 0.192 | |  | |  | |  | |  | |
| Chronic disease presence   - *Yes - No | 0.204 | | 0.090 | |  | |  | |  | |  | |
| What type of olive oil do you use?   - *Others - Extra virgin olive oil /Virgin olive oil | 0.191 | | 0.115 | | 0.294 | | **0.014** | | 0.153 | | 0.206 | |

**Illustration S1. Shows the percentage of participants from each country where A) shows the percentage of participants that use olive oil in different medical purposes. B) shows the percentage of participants that use olive oil in various purposes in cooking, C) shows the percentage of participants use of olive oil amounts per year, and D) shows what would the participants do in case of suspected adultery actions reported as percentage of participants.**


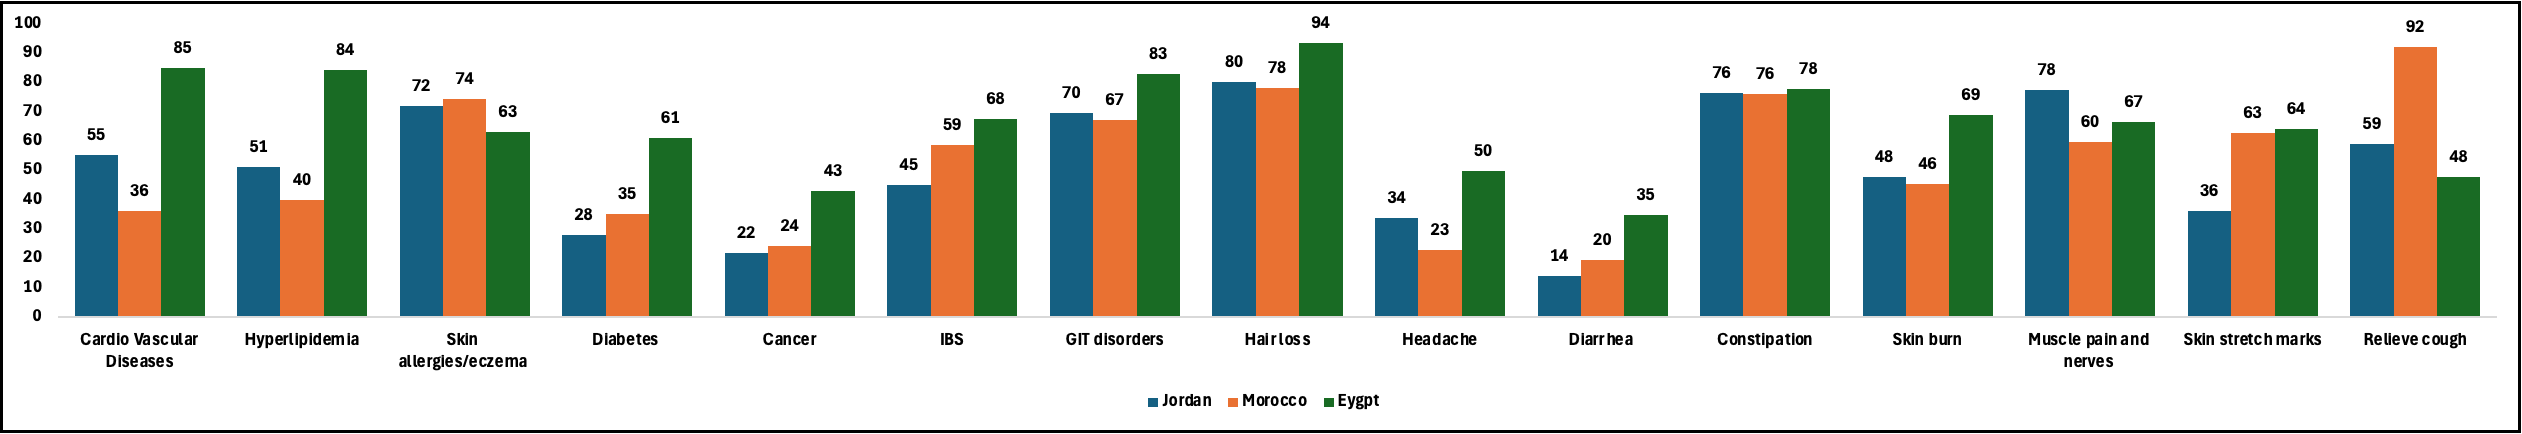

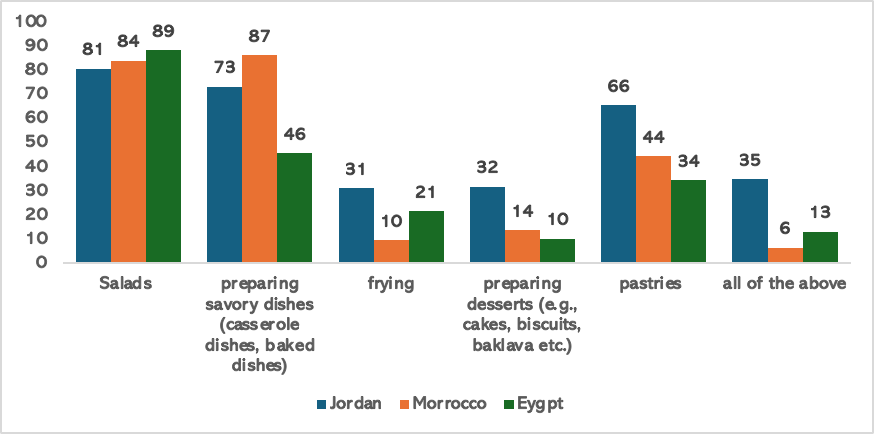

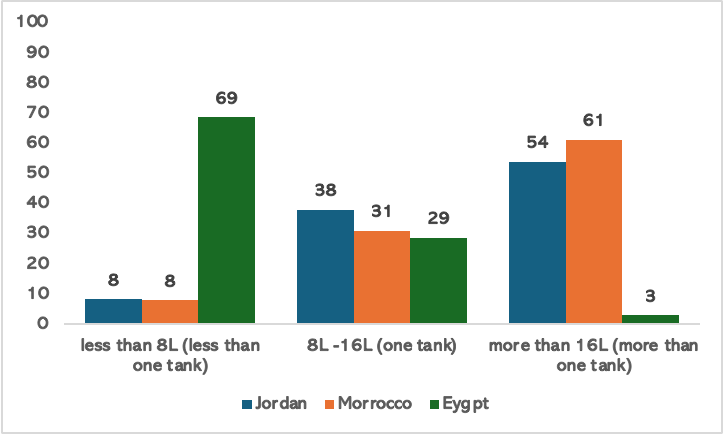

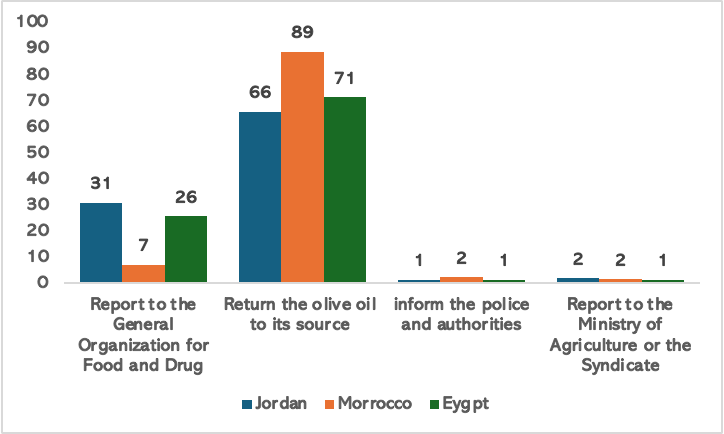

Supplement: Supplementary file 1 [file 8691bed188a72d70143e9311.docx]
